# Supplementary material
Source: Elsevier journal article supplement (https://www.sciencedirect.com/science/article/pii/S1665268122000862)
Supplement: mmc2 [file S1665268122000862:mmc2.docx]

**Supplement Table 2. Univariate analyses of factors associated with PHLF**

| Characteristics | OR | 95%CI | P |
| --- | --- | --- | --- |
| Patient factors |  |  |  |
| Sex | 0.584 | 0.227-1.499 | 0.263 |
| Male |  |  |  |
| Female |  |  |  |
| Age (year) | 1.022 | 0.992-1.053 | 0.154 |
| Hypertension | 1.009 | 0.476-2.140 | 0..982 |
| no |  |  |  |
| yes |  |  |  |
| Diabetes | 1.033 | 0.413-2.585 | 0.945 |
| no |  |  |  |
| yes |  |  |  |
| Smoking history | 1.189 | 0.584-2.421 | 0.634 |
| no |  |  |  |
| yes |  |  |  |
| Drinking history | 1.143 | 0.524-2.492 | 0.737 |
| no |  |  |  |
| yes |  |  |  |
| Tumor number | 1.889 | 1.296-2.756 | <0.001 |
| Tumor size (cm) | 1.052 | 0.964-1.149 | 0.256 |
| Antivirus | 1.037 | 0.525-2.051 | 0.916 |
| no |  |  |  |
| yes |  |  |  |
| HBV/HCV DNA | 1.990 | 0.988-4.010 | 0.054 |
| <50IU/ml |  |  |  |
| ≥50IU/ml |  |  |  |
| Cirrhosis | 4.129 | 1.906-8.942 | <0.0001 |
| no |  |  |  |
| yes |  |  |  |
| Preoperative AST (IU/L) | 1.004 | 0.998-1.009 | 0.171 |
| Preoperative PLT (109/L) | 0.981 | 0.974-0.989 | <0.0001 |
| APRI |  | 0.923-10.981 | 0.067 |
| <2 |  |  |  |
| ≥2 |  |  |  |
| Preoperative bilirubin (umol/L) | 1.006 | 0.997-1.015 | 0.191 |
| Preoperative albumin (g/L) | 1.002 | 0.986-1.018 | 0.836 |
| ALBI | 1.697 | 0.864-3.333 | 0.125 |
| ≤-2.6 |  |  |  |
| -2.6 to -1.39 |  |  |  |
| >-1.39 |  |  |  |
| Operative factors |  |  |  |
| Hepatic portal blocking | 2.069 | 1.006-4.252 | 0.048 |
| no |  |  |  |
| yes |  |  |  |
| Pringle maneuver (min) | 1.026 | 1.008-1.045 | 0.006 |
| Blood loss (ml) | 2.464 | 1.210-5.018 | 0.013 |
| <600 |  |  |  |
| ≥600 |  |  |  |
| Transfusion (ml) | 1.001 | 1.000-1.001 | 0.004 |
| Resection range | 2.242 | 1.123-4.475 | 0.022 |
| <3Liver segment |  |  |  |
| ≥3Liver segment |  |  |  |
| Postoperative factors |  |  |  |
| [Somnipathy](D:/%E6%88%91%E7%9A%84/Dict/8.9.5.0/resultui/html/index.html#/javascript:;) | 1.197 | 0.409-3.497 | 0.743 |
| no |  |  |  |
| yes |  |  |  |
| [Hemostatics](D:/%E6%88%91%E7%9A%84/Dict/8.9.5.0/resultui/html/index.html#/javascript:;) | 2.731 | 1.371-5.439 | 0.004 |
| no |  |  |  |
| yes |  |  |  |
| [Ascites](D:/%E6%88%91%E7%9A%84/Dict/8.9.5.0/resultui/html/index.html#/javascript:;) | 7.481 | 3.141-17.817 | <0.0001 |
| no |  |  |  |
| yes |  |  |  |
| Anticoagulants | 0.354 | 0.166-0.758 | 0.007 |
| no |  |  |  |
| yes |  |  |  |

HCC, Hepatocellular carcinoma; PHLF, Post-hepatectomy liver failure; HBV, Hepatitis B virus; APRI, Aspartate aminotransferase-to-platelet ratio index; ALBI, Albumin-bilirubin; PLT, Platelets; AST, Aspartate aminotransferase; OR, odds ratio; CI, confidence interval;

P < 0.05 was defined as statistical significance.
