# Supplementary material
Source: Elsevier journal article supplement (https://www.sciencedirect.com/science/article/pii/S1665268122000862)
Supplement: mmc3 [file S1665268122000862:mmc3.docx]

**Supplement Table 3.** [**Univariate**](D:/%E6%88%91%E7%9A%84/Dict/8.9.5.0/resultui/html/index.html#/javascript:;) **and multivariate analyses of factors associated with PHLF**

| Factors | Overall survival | | | | | |
| --- | --- | --- | --- | --- | --- | --- |
| [Univariate](D:/%E6%88%91%E7%9A%84/Dict/8.9.5.0/resultui/html/index.html#/javascript:;) analysis | | | Multivariate analysis | | |
| HR | 95% Cl | *p* | HR | 95% Cl | *p* |
| Sex: Male vs Female | 0.835 | 0.242-2.884 | 0.775 |  |  |  |
| Age | 1.085 | 1.028-1.146 | **0.003** | 1.092 | 1.027-1.160 | **0.005** |
| Hypertension: no vs yes | 0.728 | 0.273-1.939 | 0.525 |  |  |  |
| Diabetes: no vs yes | 0.472 | 0.168-1.323 | 0.153 |  |  |  |
| Smoking history: no vs yes | 0.929 | 0.306-2.823 | 0.897 |  |  |  |
| Drinking history: no vs yes | 0.692 | 0.199-2.409 | 0.563 |  |  |  |
| Tumor number | 1.205 | 0.763-1.903 | 0.424 |  |  |  |
| Tumor size: ≤5 vs >5 | 0.959 | 0.830-1.109 | 0.575 |  |  |  |
| Hepatic portal blocking: no vs yes | 0.770 | 0.383-1.548 | 0.463 |  |  |  |
| Pringle maneuver | 0.997 | 0.970-1.024 | 0.815 |  |  |  |
| Antivirus: no vs yes | 0.699 | 0.253-1.932 | 0.490 |  |  |  |
| HBVDNA:<50IU/ml vs ≥50IU/ml | 1.229 | 0.461-3.275 | 0.680 |  |  |  |
| Blood loss | 0.233 | 0.093-0.588 | **0.020** |  |  |  |
| Blood transfusion | 1.001 | 1.000-1.001 | 0.089 |  |  |  |
| Cirrhosis: no vs yes | 0.128 | 0.029-0.555 | **0.006** | 0.076 | 0.015-0.386 | **0.002** |
| Resection range:<3 vs≥3 | 0.677 | 0.302-2.376 | 0.752 |  |  |  |
| Preoperative AST | 1.000 | 0.993-1.008 | 0.939 |  |  |  |
| Preoperative PLT | 0.982 | 0.973-0.992 | **<0.001** |  |  |  |
| APRI | 0.272 | 0.079-0.941 | **0.040** |  |  |  |
| Preoperative bilirubin | 1.009 | 1.002-1.016 | **0.017** | 1.012 | 1.003-1.020 | **0.006** |
| Preoperative albumin | 0.980 | 0.894-1.075 | 0.669 |  |  |  |
| ALBI | 0.058 | 0.007-0.460 | **0.023** |  |  |  |
| [Somnipathy](D:/%E6%88%91%E7%9A%84/Dict/8.9.5.0/resultui/html/index.html#/javascript:;) | 1.118 | 0.257-4.861 | 0.882 |  |  |  |
| [Hemostatics](D:/%E6%88%91%E7%9A%84/Dict/8.9.5.0/resultui/html/index.html#/javascript:;) | 7.465 | 2.161-25.793 | **0.001** | 5.367 | 1.530-18.833 | **0.009** |
| [Ascites](D:/%E6%88%91%E7%9A%84/Dict/8.9.5.0/resultui/html/index.html#/javascript:;) | 3.327 | 1.248-8.867 | **0.016** |  |  |  |
| Anticoagulants | 0.278 | 0.110-0.704 | **0.007** |  |  |  |

HCC, Hepatocellular carcinoma; PHLF, Post-hepatectomy liver failure; HBV, Hepatitis B virus; APRI, Aspartate aminotransferase-to-platelet ratio index; ALBI, Albumin-bilirubin; PLT, Platelets; AST, Aspartate aminotransferase; HR, hazard ratio; CI, confidence interval; P < 0.05 was defined as statistical significance.
